# Supplementary material for: Genome-wide analysis of cotton GH3 subfamily II reveals functional divergence in fiber development, hormone response and plant architecture
Source: PubMed Central journal article supplement (PMC6291927; doi:10.1186/s12870-018-1545-5), 2018-12-12

a

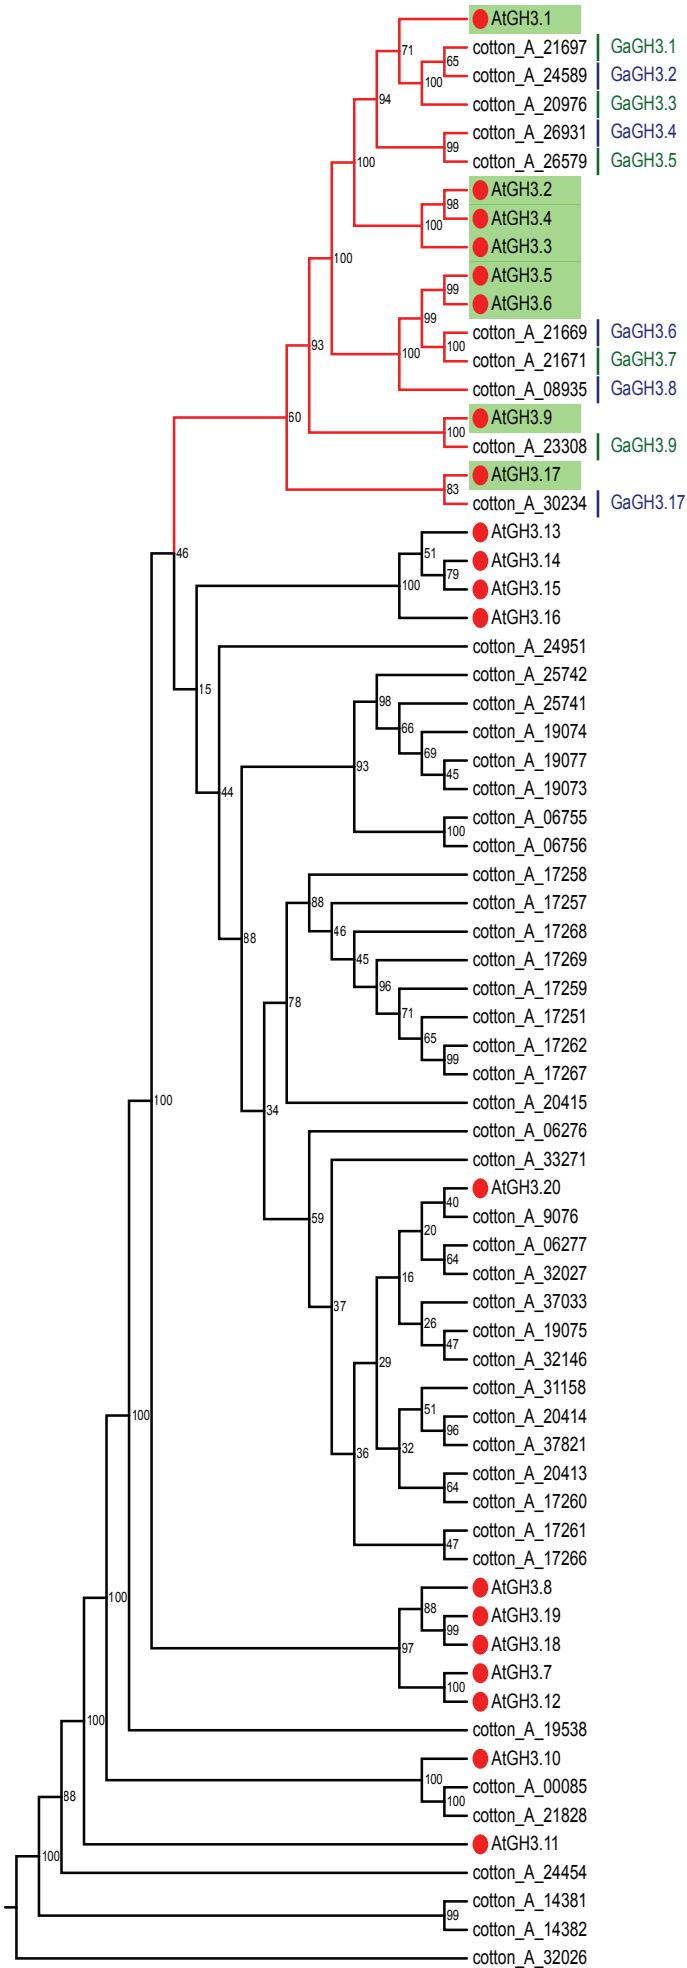

b

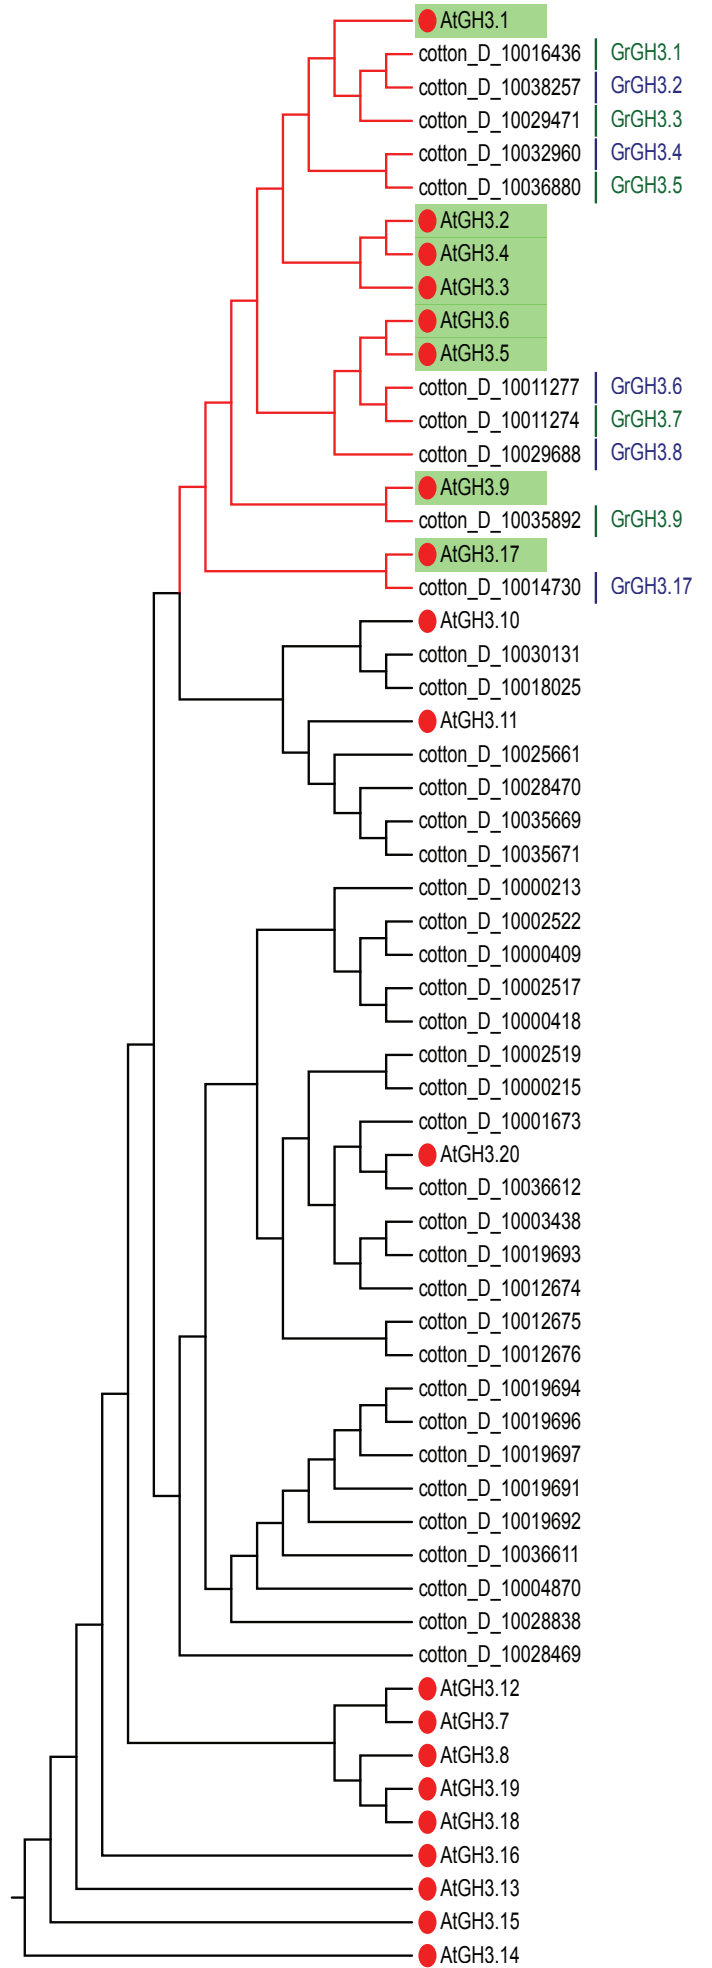

C

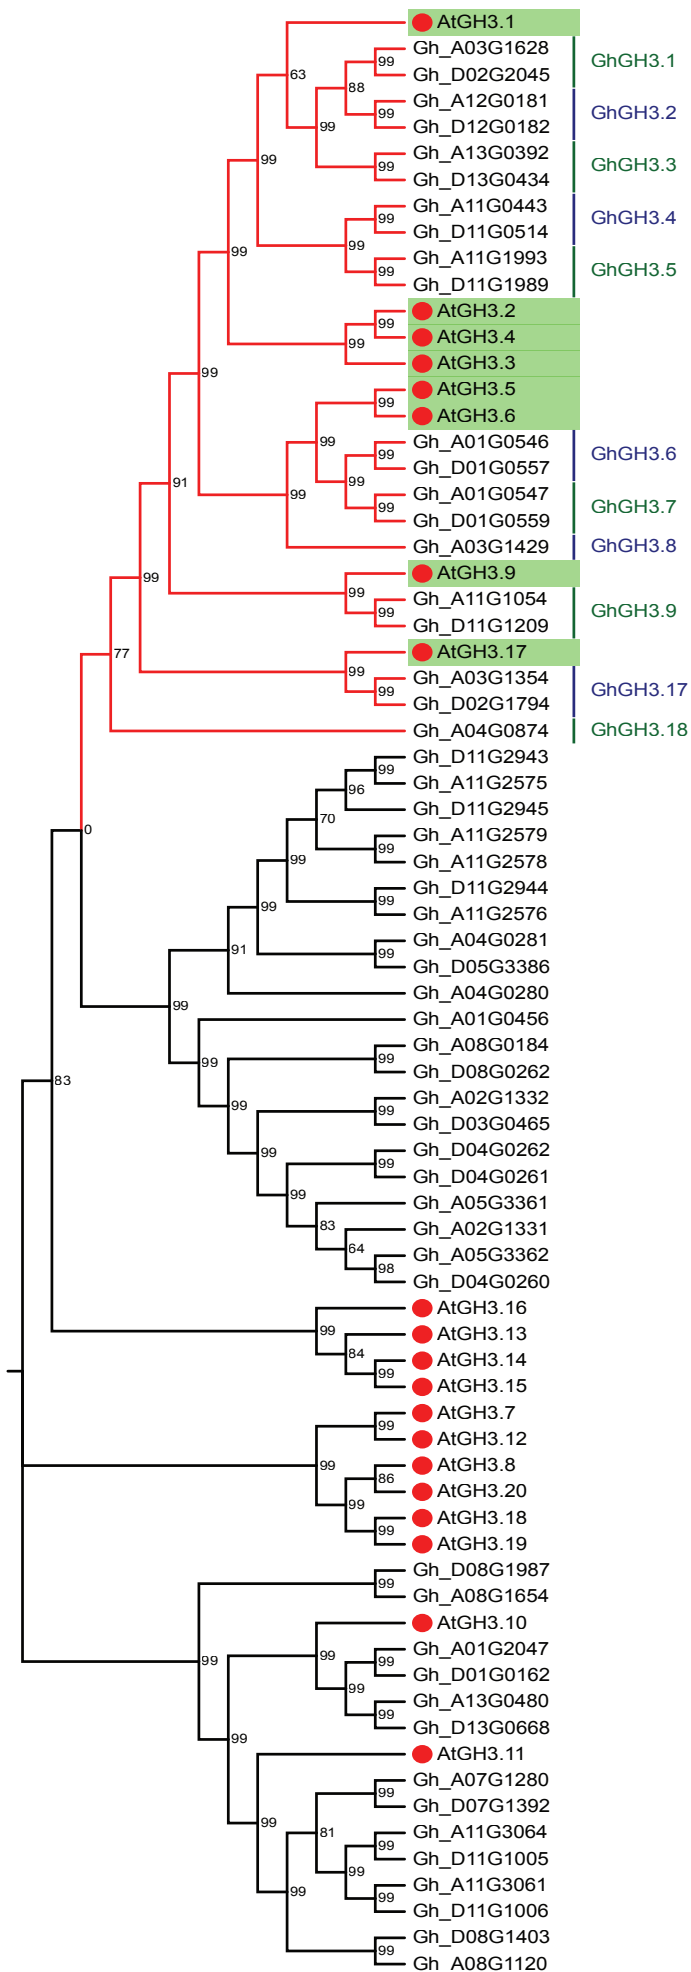

Supplement: 12870_2018_1545_MOESM2_ESM.pdf [file 12870_2018_1545_MOESM2_ESM.pdf]
