# Supplementary material for: Genome-wide analysis of cotton GH3 subfamily II reveals functional divergence in fiber development, hormone response and plant architecture
Source: PubMed Central journal article supplement (PMC6291927; doi:10.1186/s12870-018-1545-5), 2018-12-12
Supplement: 12870_2018_1545_MOESM6_ESM.pdf [file 12870_2018_1545_MOESM6_ESM.pdf]

$\alpha 18$   $\beta 19$   $\alpha 19$   $\beta 20$   
 Gh\_AGH3.1 520 530 540 550 560 \* 570 580 590  
 Gh\_AGH3.1 ESMNSVYRQGRVADNSIGLEIRVVRNGTFEELMDYAIIRGASINQYKVPKCVNF.TFIMELLDSRVVSTHESPAIPHHTPERRR.....  
 Gh\_DGH3.1 ESMNSVYRQGRVADNSIGLEIRVVRNGTFEELMDYAIIRGASINQYKVPKCVNF.TFIMELLDSRVVSTHESPAIPHHTPERRR.....  
 Gh\_AGH3.2 ESMNSVYRQGRVADNSIGLEIRVVRNGTFEELMDYAIIRGASINQYKVPKCVNF.TFIMELLDSRVVSTHESPAIPHHTPERRR.....  
 Gh\_DGH3.2 ESMNSVYRQGRVADNSIGLEIRVVRNGTFEELMDYAIIRGASINQYKVPKCVNF.TFIMELLDSRVVSTHESPAIPHHTPERRR.....  
 Gh\_AGH3.3 ESMNSVYRQGRVADNSIGLEIRVVRNGTFEELMDYAIIRGASINQYKVPKCVNF.TFIMELLDSRVVSTHESPAIPHHTPERRR.....  
 Gh\_DGH3.3 ESMNSVYRQGRVADNSIGLEIRVVRNGTFEELMDYAIIRGASINQYKVPKCVNF.TFIMELLDSRVVSTHESPAIPHHTPERRR.....  
 Gh\_AGH3.4 ESMNSVYRQGRVADNSIGLEIRVVRNGTFEELMDYAIIRGASINQYKVPKCVNF.TFIMELLDSRVVSTHESPAIPHHTPERRR.....  
 Gh\_DGH3.4 ESMNSVYRQGRVADNSIGLEIRVVRNGTFEELMDYAIIRGASINQYKVPKCVNF.TFIMELLDSRVVSTHESPAIPHHTPERRR.....  
 Gh\_AGH3.5 ESMNSVYRQGRVADNSIGLEIRVVRNGTFEELMDYAIIRGASINQYKVPKCVNF.TFIMELLDSRVVSTHESPAIPHHTPERRR.....  
 Gh\_DGH3.5 ESMNSVYRQGRVADNSIGLEIRVVRNGTFEELMDYAIIRGASINQYKVPKCVNF.TFIMELLDSRVVSTHESPAIPHHTPERRR.....  
 Gh\_AGH3.6 ESMNSVYRQGRVADNSIGLEIRVVRNGTFEELMDYAIIRGASINQYKVPKCVNF.TFIMELLDSRVVSTHESPAIPHHTPERRR.....  
 Gh\_DGH3.6 ESMNSVYRQGRVADNSIGLEIRVVRNGTFEELMDYAIIRGASINQYKVPKCVNF.TFIMELLDSRVVSTHESPAIPHHTPERRR.....  
 Gh\_AGH3.7 ESMNSVYRQGRVADNSIGLEIRVVRNGTFEELMDYAIIRGASINQYKVPKCVNF.TFIMELLDSRVVSTHESPAIPHHTPERRR.....  
 Gh\_DGH3.7 ESMNSVYRQGRVADNSIGLEIRVVRNGTFEELMDYAIIRGASINQYKVPKCVNF.TFIMELLDSRVVSTHESPAIPHHTPERRR.....  
 Gh\_AGH3.8 ESMNSVYRQGRVADNSIGLEIRVVRNGTFEELMDYAIIRGASINQYKVPKCVNF.TFIMELLDSRVVSTHESPAIPHHTPERRR.....  
 Gh\_DGH3.8 ESMNSVYRQGRVADNSIGLEIRVVRNGTFEELMDYAIIRGASINQYKVPKCVNF.TFIMELLDSRVVSTHESPAIPHHTPERRR.....  
 Gh\_AGH3.9 ESMNSVYRQGRVADNSIGLEIRVVRNGTFEELMDYAIIRGASINQYKVPKCVNF.TFIMELLDSRVVSTHESPAIPHHTPERRR.....  
 Gh\_DGH3.9 ESMNSVYRQGRVADNSIGLEIRVVRNGTFEELMDYAIIRGASINQYKVPKCVNF.TFIMELLDSRVVSTHESPAIPHHTPERRR.....  
 Gh\_AGH3.17 ESMNSVYRQGRVADNSIGLEIRVVRNGTFEELMDYAIIRGASINQYKVPKCVNF.TFIMELLDSRVVSTHESPAIPHHTPERRR.....  
 Gh\_DGH3.17 ESMNSVYRQGRVADNSIGLEIRVVRNGTFEELMDYAIIRGASINQYKVPKCVNF.TFIMELLDSRVVSTHESPAIPHHTPERRR.....  
 Gh\_AGH3.18 QSLNLFVCRASRMGNSIGLEIRVVRNGTFEELMDFSVKGGSSVQYNTPRCIRKL.EEALKILNSRVVGRYPSOQLPGYKILKWKLNKSM...  
 AtGH3.1 ESMNSVYRQGRVADNSIGLEIRVVRNGTFEELMDYAIIRGASINQYKVPKCVNF.TFIMELLDSRVVSTHESPAIPHHTPERRR.....  
 AtGH3.2 ESMNSVYRQGRVADNSIGLEIRVVRNGTFEELMDYAIIRGASINQYKVPKCVNF.TFIMELLDSRVVSTHESPAIPHHTPERRR.....  
 AtGH3.3 ESMNSVYRQGRVADNSIGLEIRVVRNGTFEELMDYAIIRGASINQYKVPKCVNF.TFIMELLDSRVVSTHESPAIPHHTPERRR.....  
 AtGH3.4 ESMNSVYRQGRVADNSIGLEIRVVRNGTFEELMDYAIIRGASINQYKVPKCVNF.TFIMELLDSRVVSTHESPAIPHHTPERRR.....  
 AtGH3.5 ESMNSVYRQGRVADNSIGLEIRVVRNGTFEELMDYAIIRGASINQYKVPKCVNF.TFIMELLDSRVVSTHESPAIPHHTPERRR.....  
 AtGH3.6 ESMNSVYRQGRVADNSIGLEIRVVRNGTFEELMDYAIIRGASINQYKVPKCVNF.TFIMELLDSRVVSTHESPAIPHHTPERRR.....  
 AtGH3.9 ESMNSVYRQGRVADNSIGLEIRVVRNGTFEELMDYAIIRGASINQYKVPKCVNF.TFIMELLDSRVVSTHESPAIPHHTPERRR.....  
 AtGH3.17 DCLEIYVRCNRKRSIGLEIRVVRNGTFEELMDFSVKGGSSVQYNTPRCIRKL.EEALKILNSRVVGRYPSOQLPGYKILKWKLNKSM...  
 GmGH3.1 ESMNSVYRQGRVADNSIGLEIRVVRNGTFEELMDYAIIRGASINQYKVPKCVNF.TFIMELLDSRVVSTHESPAIPHHTPERRR.....  
 GmGH3.2 ESMNSVYRQGRVADNSIGLEIRVVRNGTFEELMDYAIIRGASINQYKVPKCVNF.TFIMELLDSRVVSTHESPAIPHHTPERRR.....  
 GmGH3.6 ESMNSVYRQGRVADNSIGLEIRVVRNGTFEELMDYAIIRGASINQYKVPKCVNF.TFIMELLDSRVVSTHESPAIPHHTPERRR.....  
 GmGH3.8 ESMNSVYRQGRVADNSIGLEIRVVRNGTFEELMDYAIIRGASINQYKVPKCVNF.TFIMELLDSRVVSTHESPAIPHHTPERRR.....  
 GmGH3.10 ESMNSVYRQGRVADNSIGLEIRVVRNGTFEELMDYAIIRGASINQYKVPKCVNF.TFIMELLDSRVVSTHESPAIPHHTPERRR.....  
 GmGH3.14 ESMNSVYRQGRVADNSIGLEIRVVRNGTFEELMDYAIIRGASINQYKVPKCVNF.TFIMELLDSRVVSTHESPAIPHHTPERRR.....  
 GmGH3.22 ESMNSVYRQGRVADNSIGLEIRVVRNGTFEELMDYAIIRGASINQYKVPKCVNF.TFIMELLDSRVVSTHESPAIPHHTPERRR.....
